# Supplementary material for: Linking diverse nutrient patterns to different water masses within anticyclonic eddies in the upwelling system off Peru
Source: Copernicus journal article supplement (doi:10.5194/bg-14-1349-2017), 2017-03-20

Supplement of Biogeosciences, 14, 1349–1364, 2017  
<http://www.biogeosciences.net/14/1349/2017/>  
doi:10.5194/bg-14-1349-2017-supplement  
© Author(s) 2017. CC Attribution 3.0 License.

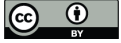

*Supplement of*

## **Linking diverse nutrient patterns to different water masses within anticyclonic eddies in the upwelling system off Peru**

**Yonss Saranga José et al.**

*Correspondence to:* Yonss Saranga José (yjose@geomar.de)

The copyright of individual parts of the supplement might differ from the CC-BY 3.0 licence.

**Abstract.** The supplementary information presents details of the methods used in the main text. It is composed by three sections, where additional description of the biogeochemical model, region extent of the model domain, the particle release experiment as well as the water mass properties at the instant following the eddy  $A_{sim}$  and  $B_{sim}$  formation.

## 1 Biogeochemical model

5 *BioEBUS* is a nitrogen-based model, developed from the  $N_2P_2Z_2D_2$  by Kone et al. (2005). This model contains 12 compartments (Gutknecht et al., 2013). As described in Gutknecht et al. (2013), marine biota are represented by four compartments and comprise the first trophic level of the food web, small (nano/ picophytoplankton and microzooplankton) and large (diatoms and mesozooplankton) organisms. The phytoplankton growth is limited only by the availability of fixed nitrogen in the water column. The nitrogen cycling includes denitrification, nitrification and anammox processes, as well as uptake by phytoplankton in the sun-lit surface layer and subsequent cycling and re-cycling by the planktonic ecosystem. The model also represents dissolved oxygen, allowing a separation of respiration processes occurring under oxic and suboxic conditions.

### 1.1 Model parameters

To simulate the biogeochemical dynamics of the *ETSP*, we essentially used the same parameters as in previous studies Gutknecht et al. (2013) and Montes et al. (2014). Some parameters are adjusted, in order to obtain a better agreement with the observed dynamics of the *ETSP* (Table (1)). These parameters include the half saturation constant for nutrient (ammonium, nitrate and nitrite) uptake by both small and large phytoplankton classes, zooplankton (including small and large classes) feeding preferences, half saturation constant for zooplankton (including small and large classes) ingestion. The constants for nutrient uptake by phytoplankton and the zooplankton ingestion are adjusted to the values presented in Kone et al. (2005). The rate of first and second stage of nitrification consist of parameter values used in Gutknecht et al. (2013) and in Montes et al. (2014) respectively. The adjustment of the phytoplankton nutrient uptake and the zooplankton dynamics constants led to a reduction of both phytoplankton and zooplankton production, and consequently export production, and an improved agreement with vertical nutrient and oxygen profiles. Adjustments of the rates of nitrification allowed a better reproduction of nitrite and nitrate distributions in our model configuration.

## 2 Model domain

25 Figure SI-1 shows the extension of the model domain used in the 2 way-nesting procedure to simulate the high-resolution biophysical dynamics of the Eastern Tropical South Pacific (*ETSP*). As the *ETSP* is strongly influenced by equatorial dynamics (Montes et al., 2010), a larger model domain with a coarser grid, covering the relevant current systems of the *ETPS*, is used to force the high-resolution model centered on the oxygen minimum zone off Peru.

## 3 Variation in eddy $A_{sim}$ and $B_{sim}$ volume during their propagation

30 Figure SI-2 illustrate the evolution of the eddies  $A_{sim}$  and  $B_{sim}$  volume during its propagation. The eddy volume, which is mainly controlled by the horizontal structure of the eddy, vary as the eddies  $A_{sim}$  and  $B_{sim}$  move. Significant increase in volume occurs from early stage of the eddy life, period following its formation. Different from the eddy  $A_{sim}$  (Fig. SI-2-a), the volume of the eddy  $B_{sim}$  (Fig. SI-2-b) does not vary much after the first month following its formation.

## 4 Particle release experiment

35 In Figure SI-3 are illustrated the locations of particle release (light blue) as well as the tracked anticyclonic eddies (filled circles and triangles) during the model particle-release experiments. The particle-release experiments, which consisted of releasing inactive Lagrangian particles along the shelf and off Peru, are conducted to investigate the capability of anticyclonic eddies

to exchange water masses with the surrounding environment. In order to cover possible seasonality effects, the particles were released in both summer and winter seasons of the southern hemisphere.

## 5 Water masses properties following the eddy $A_{sim}$ and $B_{sim}$

The present section aims to analyse the environmental conditions at the eddies  $A_{sim}$  and  $B_{sim}$  formation place. Figure SI-4 presents the water mass and nutrient distribution following the eddy  $A_{sim}$  formation. At that instant, the eddy interior was dominated by the water masses from the offshore region. These water masses presented distinct properties which varies with depth. At the surface layer down 100 m depth, the offshore waters were warmer and saltier. Both nitrate and nitrite concentrations were lower than the shelf waters. Below this layer, the offshore waters were cooler and fresher, with low nutrient concentrations. Is visible in the 100 m and 250 m a limb of shelf nitrite-rich waters in the northern edge of the structure, suggestive of entrainment by the eddy stirring.

The eddy  $B_{sim}$ , which is an open ocean eddy, also shown different water masses properties with depth (Fig. SI-5). A remarkable difference is observed between 100 m and 250 m depth, where is visible an increment up to  $20 \mu\text{mol l}^{-1}$  of nitrate.

**Table 1.** Adjusted parameter used in the biogeochemical model.

| Parameter                                                                                   | Units                  | Value |
|---------------------------------------------------------------------------------------------|------------------------|-------|
| Half saturation constant for NH <sub>4</sub> uptake by large phytoplankton                  | mmol N m <sup>-3</sup> | 0.7   |
| Half saturation constant for NO <sub>2</sub> +NO <sub>3</sub> uptake by small phytoplankton | mmol N m <sup>-3</sup> | 1.0   |
| Preference of small zooplankton to small phytoplankton                                      | mmol N m <sup>-3</sup> | 0.75  |
| Preference of small zooplankton to large phytoplankton                                      | mmol N m <sup>-3</sup> | 0.25  |
| Preference of large zooplankton to large phytoplankton                                      | mmol N m <sup>-3</sup> | 0.5   |
| Preference of large zooplankton to small zooplankton                                        | mmol N m <sup>-3</sup> | 0.24  |
| Half saturation constant for ingestion by small zooplankton                                 | mmol N m <sup>-3</sup> | 1.0   |
| Half saturation constant for ingestion by large zooplankton                                 | mmol N m <sup>-3</sup> | 2.0   |
| Rate of first stage of nitrification                                                        | d <sup>-1</sup>        | 0.9   |
| Rate of second stage of nitrification                                                       | d <sup>-1</sup>        | 0.025 |

## References

- Gutknecht E., I. Dadou, B. Le Vu, G. Cambon, J. Sudre, V. Garçon, E. Machu, T. Rixen, A. Kock, A. Flohr, A. Paulmier, and G. Lavik, Coupled physical/biogeochemical modeling including O<sub>2</sub>-dependent processes in the Eastern Boundary Upwelling Systems: application in the Benguela, *Biogeosciences*, **10**, 3559-3591, 2013.
- 5 Koné V., Machu E., Penven P., Andersen V. Garçon, Fréon P. and Demarcq H., Modeling the primary and secondary productions of the southern Benguela upwelling system: A comparative study through two biogeochemical models, *Global Biogeochemical cycles*, **19**, doi:10.1029/2004GB002427, 2005.
- Montes I., F. Colas, X. Capet and W. Schneider, On the pathways of the equatorial subsurface currents in the eastern equatorial Pacific and their contributions to the Peru - Chile Undercurrent, *Journal of Geophysical research*, *115*, 1-16, doi:10.1029/2009JC005710, 2010.
- 10 Montes I., B. Dewitte, E. Gutknecht, A. Paulmier, I. Dadou, A. Oschlies and V. Garçon, High-resolution modeling of the Eastern Tropical Pacific oxygen minimum zone: Sensitivity to the tropical oceanic circulation, *Journal of Geophysical research*, *119*, 1-18, 2014.

**Figure SI- 1.** Model bathymetry of the Eastern Tropical South Pacific. The black square denotes the zoom into the eastern tropical south Pacific oxygen minimum zone. The color denotes depth in meters. The topography is derived from the GEBCO 1' data set.

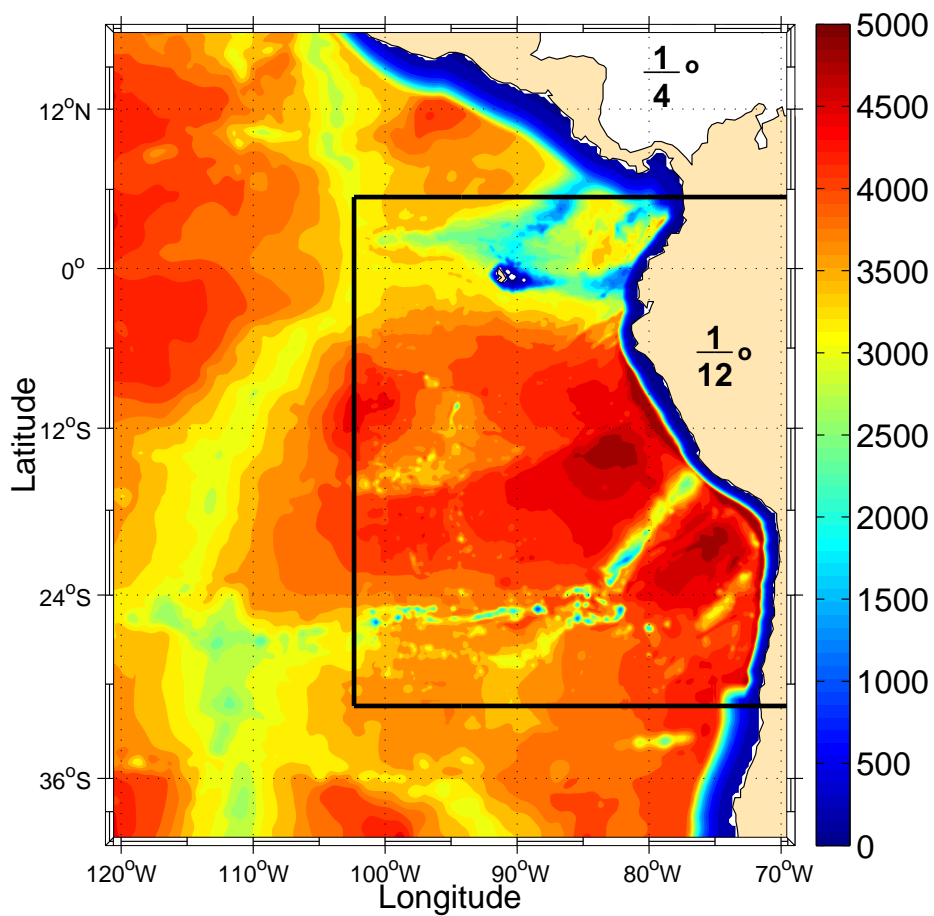

**Figure SI- 2.** Volume evolution of the eddy  $A_{sim}$  (a) and  $B_{sim}$  (b) during their propagation.

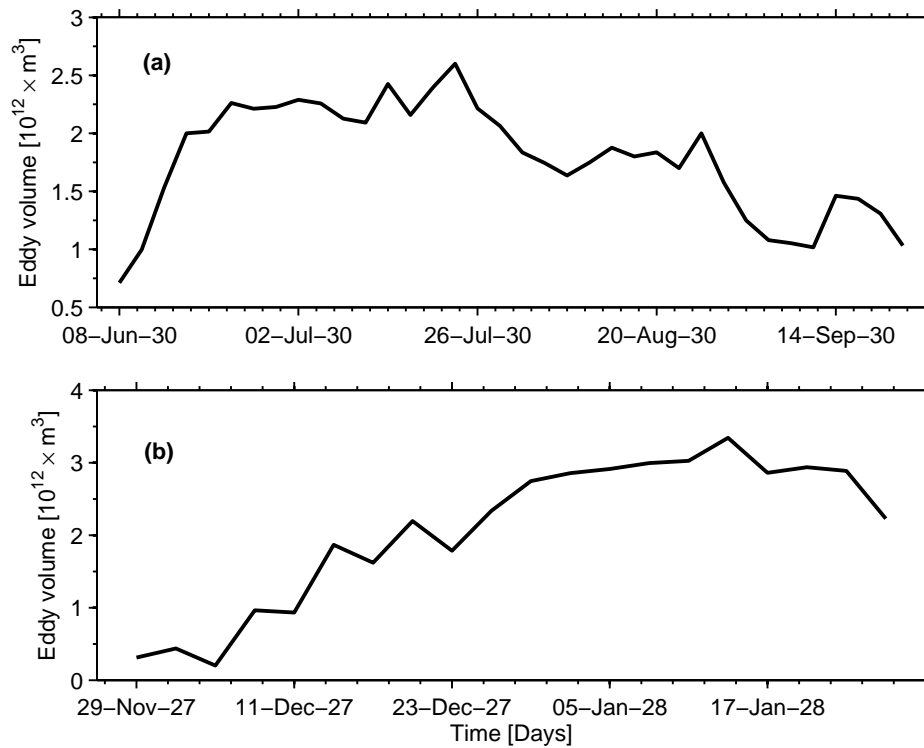

**Figure SI- 3.** Particle release sites (light blue) and the trajectory of tracked anticyclonic eddies (filled circles and triangles) during the particle release experiment. Colour in tracked eddies correspond to model years, with black for year 28, red for year 29 and blue for year 30. Eddies tracked during summer and winter are represented in filled circles and triangles respectively.

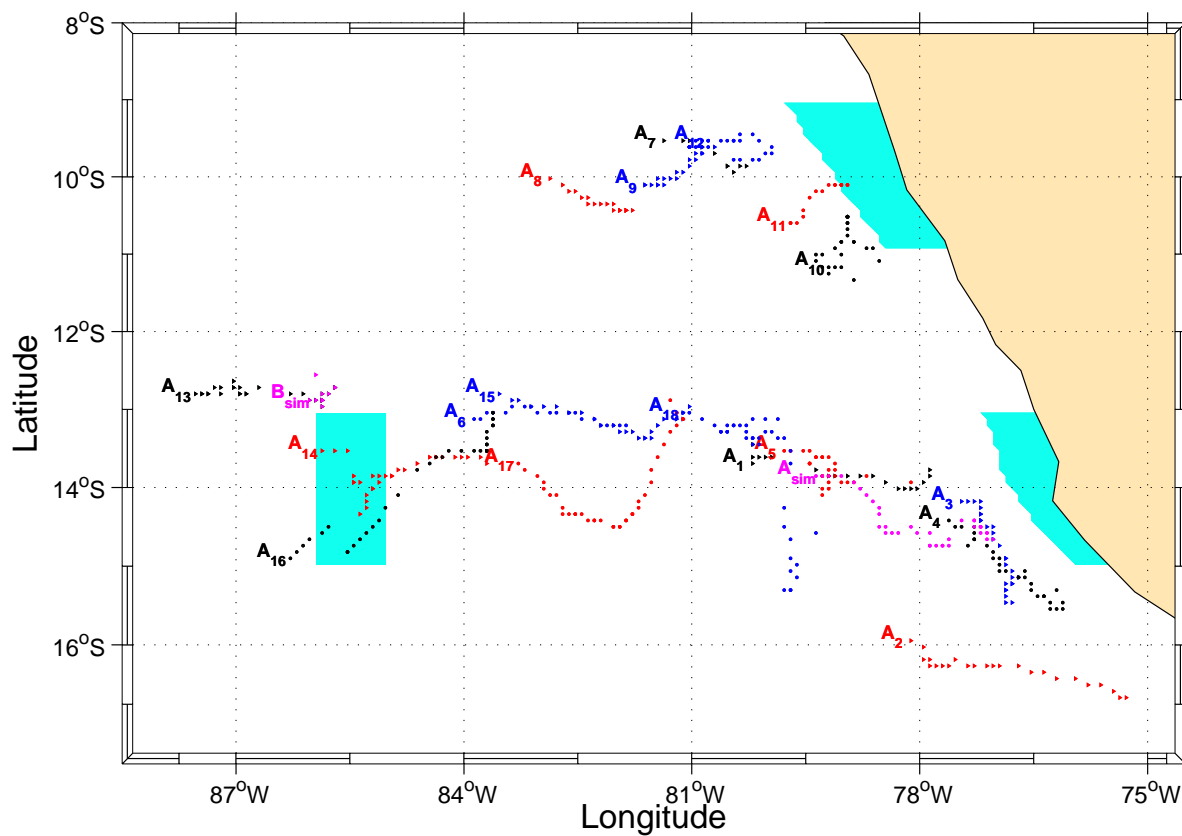

**Figure SI- 4.** Water masses properties and nutrients distribution at an instant following the eddy  $A_{sim}$  formation. *Left panels:* Spatial distribution of simulated salinity at surface (upper panels), 100m (middle panels) and 200 m depth (bottom panels). *Middle left panels:* The same as left panel, but for temperature. *Middle right panels:* The same as left panel, but for nitrate. *right panels:* The same as left panel, but for nitrite. The arrows represent the circulation patterns at the eddy's edge.

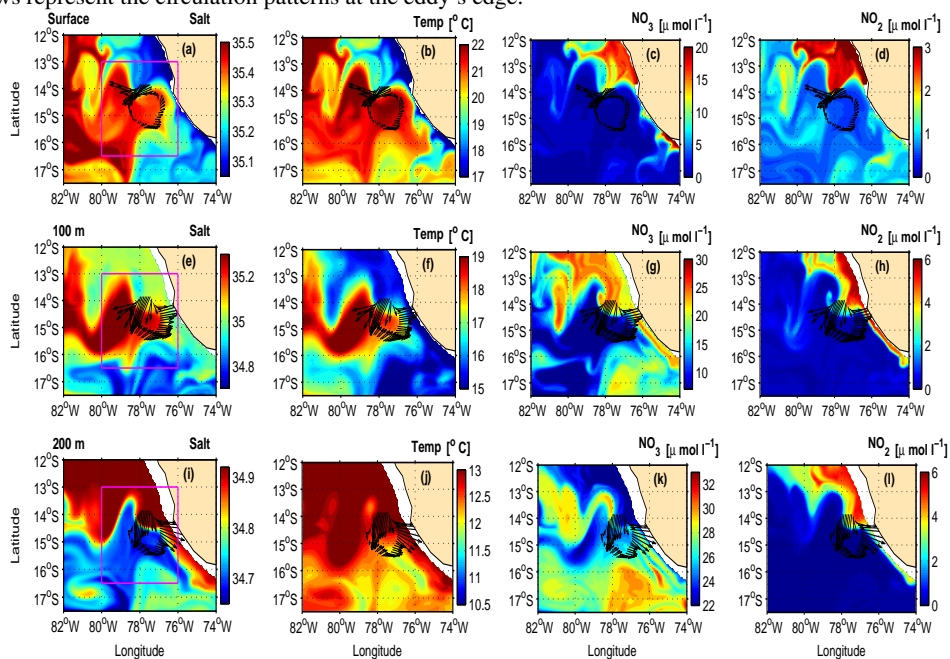



**Figure SI- 5.** Water masses properties and nutrients distribution at an instant following the eddy  $B_{sim}$  formation. *Left panels:* Spatial distribution of simulated salinity at surface (upper panels), 100m (middle panels) and 200 m depth (bottom panels). *Middle left panels:* The same as left panel, but for temperature. *Middle right panels:* The same as left panel, but for nitrate. *right panels:* The same as left panel, but for nitrite. The arrows represent the circulation patterns at the eddy's edge.

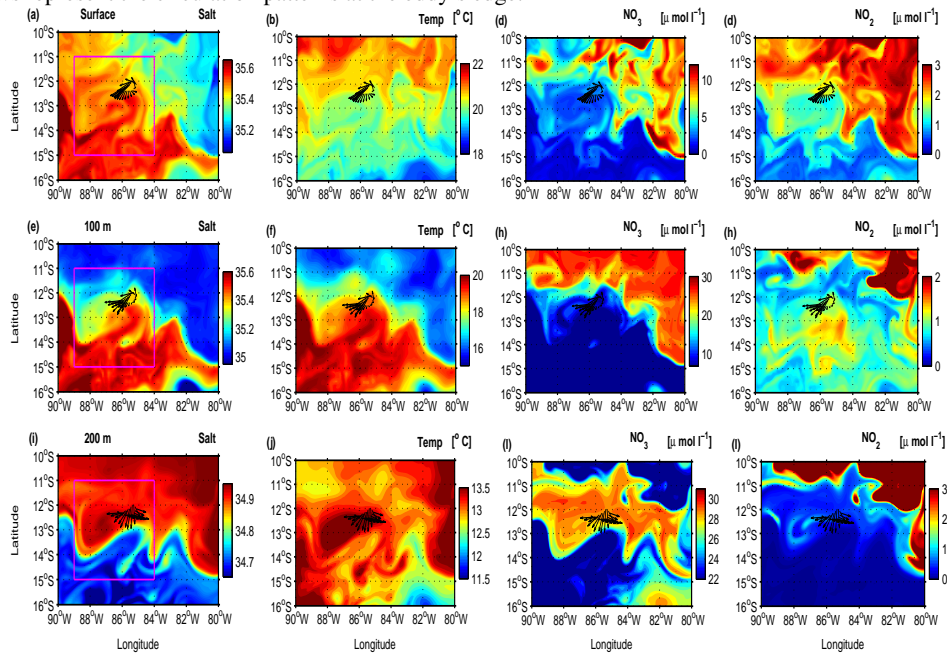

Supplement: Supplementary file 1 [file bg-14-1349-2017-supplement.pdf]
